# Supplementary material for: Isolation and Characterization of the GmMT-II Gene and Its Role in Response to High Temperature and Humidity Stress in Glycine max
Source: MDPI journal article supplement (doi:10.3390/plants11111503), 2022-06-03
Supplement: s1 [file s1]

**Table S1.** The primers used in all experiments.

| Primer names  | Primer sequence (5'-3')                        | Experiments                          |
|---------------|------------------------------------------------|--------------------------------------|
| ORF-GmMT-II-F | AGAGAGAAAAATGGCTGATACAAGT                      | segregation of genes                 |
| ORF-GmMT-II-R | AAATCACATCCACAATTTGAACA                        |                                      |
| pBT3Gm1-MMP-F | TTGGCCATTACGGCCATGACTCTCCGCAAC<br>CACC         | Yeast Two-Hybrid Rotation Validation |
| pBT3Gm1-MMP-R | AAGGCCGAGGCGGCCCCGGGGTTGATACC<br>ATAGAGCTTTTCG |                                      |
| pPR3N-GmMT-F  | TTGGCCATTACGGCCATGGCTGATACAAGT<br>GGAG         |                                      |
| pPR3N-GmMT-R  | AAGGCCGAGGCGGCCCAGTGCGGCAAGAG<br>GCACATGAGCA   |                                      |
| nE-Gm1-MMP-F  | GCTTCGAATTCTGCAGTCGACATGACTCTCC<br>GCAACCACC   |                                      |
| nE-Gm1-MMP-R  | GACTCTAGATCAGGTGGATCCGGGGTTGAT<br>ACCATAGAGC   |                                      |
| cE-GmMT-F     | GCTTCGAATTCTGCAGTCGACATGGCTGAT<br>ACAAGTGGAG   | BiFC experiments                     |
| cE-GmMT-R     | GACTCTAGATCAGGTGGATCCAGTGCGGCA<br>AGAGGCACAT   |                                      |
| nEYFP-F       | GAAGAACGGCATCAAGGT                             |                                      |
| nEYFP-R       | CGACAGGTTTCCCGACTG                             |                                      |
| cEYFP-F       | CACTACCAGCAGAACACCC                            | Interaction site research            |
| cEYFP-R       | CAGCTATGACCATGATTAC                            |                                      |
| Gm1-MMP-S-F   | TTGGCCATTACGGCCATGACTCTCCGCAAC<br>CACC         |                                      |
| Gm1-MMP-S-R   | AAGGCCGAGGCGGCCCCTAGAATTGCAAG<br>AGCAACCAAGAG  |                                      |
| Gm1-MMP-P-F   | TTGGCCATTACGGCCTATTTTCTTGCCACCT<br>CAC         |                                      |
| Gm1-MMP-P-R   | AAGGCCGAGGCGGCCCCGGTATAGTCCGA<br>GATCATGCCAAA  |                                      |
| Gm1-MMP-C-F   | TTGGCCATTACGGCCTTCTTCAAAGACATG<br>CCGC         |                                      |
| Gm1-MMP-C-R   | AAGGCCGAGGCGGCCCCGGGGTTGATACC<br>ATAGAGCTTTTCG |                                      |
| GmMT-N-F      | TTGGCCATTACGGCCATGGCTGATACAAGT<br>GGAG         |                                      |
| GmMT-N-R      | AAGGCCGAGGCGGCCCCGCACCTGCAAGTG<br>GAACCACCAGT  |                                      |

|               |                                              |                             |
|---------------|----------------------------------------------|-----------------------------|
| GmMT-C-F      | TTGGCCATTACGGCCACAAGTGTCGGCATG<br>ACAA       |                             |
| GmMT-C-R      | AAGGCCGAGGCGGCCAGTGCGGCAAGAG<br>GCACATGAGCA  |                             |
| qRT-GmMT-II-F | GCAGTGAGACCGGTGGTAATA                        |                             |
| qRT-GmMT-II-R | AGTTCCAGAAGCCGCAGTC                          | RT-qPCR                     |
| Actin-F       | CCTCAACCCAAAGGTCAACAG                        |                             |
| Actin-R       | GACCAGCGAGATCCAAACGAA                        |                             |
| pA7-GmMT-II-F | CACCATCACCATCACGCCATGATGGCTGAT<br>ACAAGTGGAG |                             |
| pA7-GmMT-II-R | CACTAGTACGTCGACCATGGCAGTGCGGCA<br>AGAGGCACAT | Subcellular<br>localization |
| pA7-F         | AAGCAATCAAGCATTCTACTTCTAT                    |                             |
| pA7-R         | GGTAGCGGCTGAAGCACTG                          |                             |
